## A vaccine built from potential immunogenic pieces derived from the SARS-CoV-2 spike glycoprotein.

### Graphical Abstract:

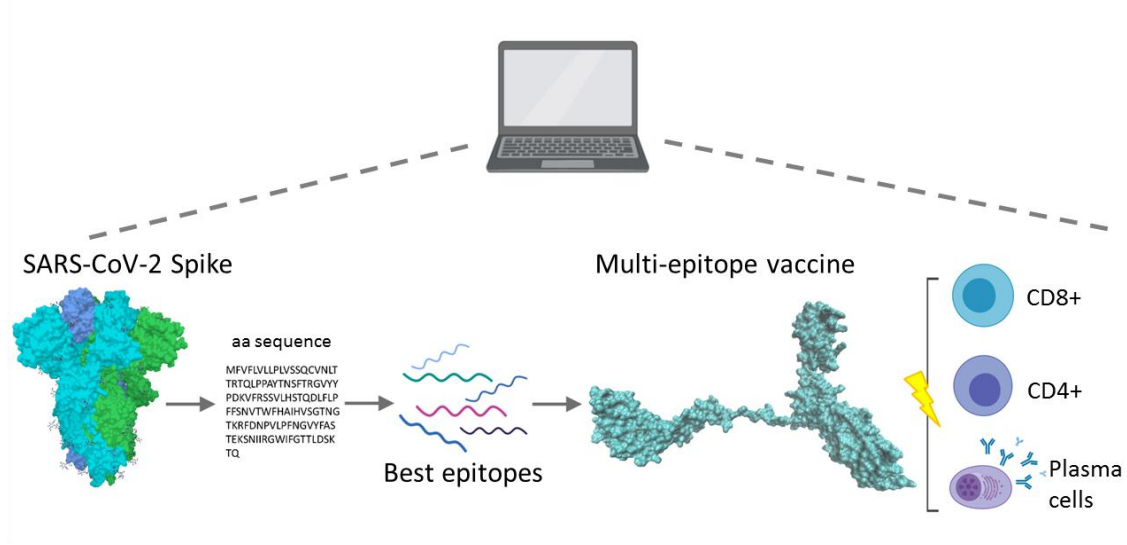

### Author

Jose Marchan.

Experimental Medicine Centre. Venezuelan Institute for Scientific Research.

### Affiliation

Experimental Medicine Centre, Venezuelan Institute for Scientific Research (IVIC).

Apartado postal 20632, Caracas 1020-A, Venezuela.

Email: [josemarchanalvarez@gmail.com](mailto:josemarchanalvarez@gmail.com) / [josemarch@ivic.gob.ve](mailto:josemarch@ivic.gob.ve)

## **ABSTRACT**

Coronavirus Disease 2019 (COVID-19) represents a new global threat demanding a multidisciplinary effort to fight its etiological agent—severe acute respiratory syndrome coronavirus 2 (SARS-CoV-2). In this regard, immunoinformatics may aid to predict prominent immunogenic regions from critical SARS-CoV-2 structural proteins, such as the spike (S) glycoprotein, for their use in prophylactic or therapeutic interventions against this rapidly emerging coronavirus. Accordingly, in this study, an integrated immunoinformatics approach was applied to identify cytotoxic T cell (CTC), T helper cell (THC), and Linear B cell (BC) epitopes from the S glycoprotein in an attempt to design a high-quality multi-epitope vaccine. The best CTC, THC, and BC epitopes showed high viral antigenicity, lack of allergenic or toxic residues, and suitable HLA-viral peptide interactions. Remarkably, SARS-CoV-2 receptor-binding domain (RBD) and its receptor-binding motif (RBM) harbour several potential epitopes. The structure prediction, refinement, and validation data indicate that the multi-epitope vaccine has an appropriate conformation and stability. Three conformational epitopes and an efficient binding between Toll-like receptor 4 (TLR4) and the vaccine model were observed. Importantly, the population coverage analysis showed that the multi-epitope vaccine could be used globally. Notably, computer-based simulations suggest that the vaccine model has a robust potential to evoke and maximize both immune effector responses and immunological memory to SARS-CoV-2. Further research is needed to accomplish with the mandatory international guidelines for human vaccine formulations.

**Keywords:** SARS-CoV-2, Spike, COVID-19, Immunoinformatics, Epitope, Vaccine.

## 1 **1. Introduction**

2 On 31st December, 2019, a dramatic increase in the number of patients with a  
3 potentially fulminant respiratory disease was reported in Wuhan, China [1]. The etiological  
4 agent was eventually identified as a novel highly pathogenic betacoronavirus—severe acute  
5 respiratory syndrome coronavirus 2 (SARS-CoV-2) [2]. Shortly thereafter, SARS-CoV-2  
6 caused an overwhelming wave of coronavirus disease 2019 (COVID-19) cases across Asia,  
7 Europe, Oceania, the Americas, and Africa, which led to the World Health Organization  
8 declared COVID-19 as a pandemic on 11th March, 2020 [1]. Unfortunately, at the time of  
9 this research, no clinically approved treatment is available to fight SARS-CoV-2, whose  
10 rapid spread has generated an explosive second wave of COVID-19 all over the world [1].

11 The SARS-CoV-2 outer membrane is decorated with several structural proteins,  
12 including the S glycoprotein, the membrane protein, and the envelope protein [3]. The S  
13 glycoprotein forms homotrimers containing both a receptor-binding domain (RBD) and a  
14 receptor-binding motif (RBM) [4]. The latter mediates contacts with human angiotensin-  
15 converting enzyme 2 (hACE2), thereby allowing SARS-CoV-2 entry into host cell [4]. This  
16 critical role in viral pathogenesis turns the SARS-CoV-2 S glycoprotein into an attractive  
17 target for vaccine development [5].

18 Multi-epitope vaccines designed from immunoinformatics tools could aid to elicit a  
19 protective immune response against SARS-CoV-2, as reported previously for other  
20 infectious agents [6,7]. In this regard, recent data indicate that the SARS-CoV-2 S  
21 glycoprotein harbours prominent immunologically active regions, which may serve as  
22 candidates for multi-epitope vaccine models [8-11]. Accordingly, the present study aimed  
23 to design a multiple-epitope vaccine construct against SARS-CoV-2 using for this purpose  
24 an integrated *in silico* approach.

25

## 26 **2. Materials and methods**

### 27 *2.1. Protein sequence retrieval*

28 Taking into account that the SARS-CoV-2 S glycoprotein represents the major target for  
29 vaccine development [5], the present work focused only on such viral spike. The complete  
30 amino acid sequence of the SARS-CoV-2 S glycoprotein was retrieved from Uniprot  
31 (<http://www.uniprot.org/>) in FASTA format (accession number: P0DTC2). Fig. 1  
32 summarises the *in silico* experimental work.

### 33 2.2. Prediction of allergenicity, toxicity, and viral antigenicity

34 Prior to clinical trials, safety evaluations of new vaccine candidates must include  
35 allergenicity and toxicity studies to avoid possible harm to humans due to the vaccine  
36 active ingredients [12]. Therefore, potential epitopes from the S glycoprotein were  
37 subjected to allergenic evaluation using two webservers: AlergenFP ([http://ddg-  
38 pharmfac.net/AllergenFP/index.html](http://ddg-pharmfac.net/AllergenFP/index.html)) [13], and Algepred  
39 ([www.imtech.res.in/raghava/algpred/](http://www.imtech.res.in/raghava/algpred/)) [14], whereas toxicity was predicted using the  
40 ToxinPred server (<http://crdd.osdd.net/raghava/toxinpred/>) [15]. Finally, viral antigenicity  
41 was calculated from the Vaxijen server (threshold: 0.5) ([www.ddg-pharmfac.net/vaxijen/](http://www.ddg-pharmfac.net/vaxijen/))  
42 [16].

### 43 2.3. Immunogenicity

44 Vaccine-mediated protection is intrinsically related to the activation of the cell-mediated  
45 and humoral responses [17]. The cell-mediated response is mainly based on the clonal  
46 expansion of human leukocyte antigen (HLA) class I-restricted CD8<sup>+</sup> cytotoxic T cells  
47 (CTC), which are critical to antiviral defence during acute infection, and HLA class II-  
48 restricted CD4<sup>+</sup> T helper cells (THC), which are necessary for the generation of specific  
49 antiviral antibodies when they crosstalk with B cells (BC) [18]. The humoral response, in  
50 contrast, involves the production of antibodies by BC [18]. Therefore, CTC, THC, and BC  
51 epitopes were predicted and the best were selected for the final vaccine design (Fig. 1). To  
52 achieve this aim, multiple prediction tools were used to improve the rate of true positives.

#### 53 2.3.1. Prediction of CTC and THC epitopes

54 Peptides that interact with HLA class I (HLA-I) and HLA class II (HLA-II) molecules  
55 commonly have 9 and 15 amino acids in length, respectively [18]. In consequence, 9-mer

56 and 15-mer peptides were considered in this work as CTC and THC epitopes, respectively  
57 (Fig. 1). These epitopes were identified using the Immune Epitope Database and Analysis  
58 Resource (IEDB-AR) (<http://tools.immuneepitope.org/main/>) [19].

59 To cross-validate binding peptides to HLA molecules, several methods were applied. In  
60 this regard, the 9-mer binding peptides to HLA-I were predicted using the artificial neural  
61 network (ANN) method [20], the Consensus method [21], and the NetMHCpan method  
62 [22]. The prediction of the 15-mer binding peptides to HLA-II was performed using the  
63 Consensus method [23], the NetMHCIIpan method [24], and the SMM-align method [25].  
64 Peptides were selected according to their percentile rank—peptides with a small percentile  
65 rank have high affinity by HLA alleles [21]. This percentile rank is generated on IEDB-AR  
66 by comparing the IC<sub>50</sub> of each predicted peptide against random peptides from  
67 SWISSPROT database.

68 In addition, binding peptides to HLA-II were also chosen by their potential to induce  
69 interferon-gamma (IFN-g) (Fig. 1), which was evaluated using the IFNepitope server  
70 (<http://crdd.osdd.net/raghava/ifnepitope/>) [26].

### 71 2.3.2. *Prediction of linear BC epitopes*

72 BCPRED (<http://ailab.ist.psu.edu/bcpred/>) [27] was used to predict linear BC epitopes  
73 based on several physicochemical properties: hydrophilicity, flexibility, accessibility, and  
74 antigenicity propensity (threshold = 1 for each parameter). Simultaneously, the S  
75 glycoprotein amino acid sequence was also subjected to iBCE-EL  
76 (<http://thegleelab.org/iBCE-EL/>) [28] and BepiPred-2.0  
77 (<http://www.cbs.dtu.dk/services/BepiPred/>) [29] for additional predictions of linear BC  
78 epitopes.

### 79 2.3.3. *Three-dimensional (3D) interaction between HLA alleles and viral peptides:* 80 *Molecular docking*

81 To evaluate the presentation of the best epitopes in the context of HLA molecules, a  
82 molecular docking study was conducted (Fig. 1). Taking into account that HLA-C\*06:02

83 and HLA-DRB1\*01:01 were predicted as common interacting HLA alleles, they were  
84 selected for this purpose.

85 The molecular docking simulation process is summarised as follows. First, the best 3D  
86 structure of each epitope (9-mer and 15-mer peptides) was obtained from PEPFOLD server  
87 (<https://bioserv.rpbs.univ-paris-diderot.fr/services/PEP-FOLD3/>) [30]. Second, the 3D  
88 structure of HLA-C\*06:02 and HLA-DRB1\*01:01 were downloaded from Protein Data  
89 Bank (PDB) (accession numbers: 5W6A and 1AQD, respectively). Third, the receptor-  
90 ligand docking simulation was performed using the PatchDock server  
91 (<http://bioinfo3d.cs.tau.ac.il/PatchDock/>), which is based on shape complementarity  
92 principles [31]. Fourth, the receptor-ligand complexes were visualized with the VMD  
93 software (Version 1.9.3) [32]. Finally, the best allele-epitope complexes were selected  
94 based upon visual inspection and the PatchDock criteria, as well as they were compared  
95 with their respective control peptides (co-crystal ligands of HLA-C\*06:02 and HLA-  
96 DRB1\*01:01).

#### 97 *2.4. Design of the multi-epitope vaccine against SARS-CoV-2*

98 High potential CTC, THC, and linear BC epitopes were selected to generate the amino  
99 acid sequence of the multi-epitope vaccine. The CTC and THC epitopes were linked  
100 together using AAY and GPGPG linkers, respectively, whereas linear BC epitopes were  
101 connected by KK linkers (Fig. 1). Moreover, a TLR4 agonist, known as RS09 (Sequence:  
102 APPHALS) [33], was added as an adjuvant at the N-terminus by using an EAAAK linker  
103 (Fig. 1). This adjuvant was chosen because of two relevant points: 1) the coronaviruses S  
104 glycoprotein may bind and activate TLR4 [34]; 2) a previous report has shown that RS09  
105 favours a good binding affinity between multi-epitope vaccines and TLR4 [35]. For future  
106 purification and identification purposes, a polyhistidine-tag (6x-H tag) was included at the  
107 C-terminus (Fig. 1).

#### 108 *2.4.1. Physicochemical evaluation and general studies*

109 The ProtParam tool (<https://web.expasy.org/protparam/>) [36] was used to examine  
110 relevant physicochemical parameters of the multi-epitope vaccine. To reconfirm its viral  
111 antigenicity and lack of allergenicity and toxicity, the web tools described in section 2.2

112 were applied. In addition, the vaccine solubility was predicted using the SOLpro server  
113 (<http://scratch.proteomics.ics.uci.edu/>) [37].

#### 114 2.4.2. Structure prediction, refinement, and validation

115 PSIPRED (<http://bioinf.cs.ucl.ac.uk/psipred/>) [38,39] and GalaxyWEB  
116 (<http://galaxy.seoklab.org/>) [40,41] were utilized to predict the secondary and tertiary  
117 structure, respectively, of the multi-epitope vaccine construct. The best model was refined  
118 with GalaxyWEB [40,41] whereas its visualization was obtained from the VMD software  
119 (Version 1.9.3) [32]. The data validation was performed using PROCHECK  
120 (<https://servicesn.mbi.ucla.edu/PROCHECK/>) [42] and ProSA-web  
121 (<https://prosa.services.came.sbg.ac.at/prosa.php>) [43].

#### 122 2.4.3. Prediction of conformational BC

123 Conformational epitopes of the multi-epitope vaccine construct were predicted from  
124 Ellipro (<http://tools.iedb.org/ellipro/>) [44], which represents the protein structure as an  
125 ellipsoid and calculates protrusion indexes for protein residues outside of such ellipsoid  
126 [44]. Minimum levels of 0.8 and a distance of 6.0 Å were applied. The epitopes were  
127 visualized with the VMD software (Version 1.9.3) [32] to illustrate their position and 3D  
128 structure.

#### 129 2.4.4. Innate immune receptor-Vaccine interaction: Molecular docking

130 Since TLR4 may serve as a sensor for the recognition of coronaviruses S glycoproteins  
131 [34], this germline-encoded pattern recognition receptor was selected for the docking study.  
132 The 3D structure of TLR4 was obtained from PDB (accession number: 4G8A). The refined  
133 model of the multi-epitope vaccine was used as a ligand. The TLR4-Vaccine docking  
134 simulation and its 3D visualization were performed with Patchdock [31] and VDM [32],  
135 respectively.

#### 136 2.4.5. In silico immune response simulations

137 To further characterize the potential immune response of the multi-epitope vaccine,  
138 immune simulations were performed using the C-ImmSim server ([http://150.146.2.1/C-  
139 IMMSIM/index.php](http://150.146.2.1/C-IMMSIM/index.php)) [45]. Three injections were applied four weeks apart as described

140 previously [46]. Furthermore, 12 injections were applied four weeks apart to simulate  
141 repeated exposure to potential immunogen. The Simpson index D was used to interpret the  
142 diversity of the immune response.

#### 143 *2.4.6. Population coverage*

144 Global population coverage of the multi-epitope vaccine construct was calculated from  
145 IEDB-AR (<http://tools.iedb.org/population/>) [47,19]. The HLA allele genotypic frequencies  
146 available on IEDB-AR were obtained from Allele Frequency Database (AFD)  
147 (<http://www.allelefrequencies.net/>). At present, AFD contains allele frequencies from 115  
148 countries and 21 different ethnicities (<http://www.allelefrequencies.net/>). Those 115  
149 countries were selected and the HLA-I and HLA-I interacting alleles predicted in this work  
150 were included to perform an HLA combined analysis. The results were shown on a world  
151 map using Rstudio software (Version 3.5.3) [48].

152

### 153 **3. Results**

#### 154 *3.1. Prediction of T cell epitopes*

155 A total of 47 T cell epitopes were predicted; however, 8 CTC and 11 THC epitopes were  
156 identified as the best (Table 1). These 19 epitopes showed a potent viral antigenicity—  
157 ranging from 0.63 to 1.52—and lack of allergenic or toxic residues in their sequences  
158 (Table 1). Moreover, THC epitopes were characterized by their potential capability to  
159 induce IFN-g (Table 1). Although “EGFNCYFPLQSYGFQ” (E47 in Table 1) could be  
160 categorized as a strong potential THC epitope, it was identified as a probable inductor of  
161 toxicity. Therefore, this epitope was not included in the amino acid sequence of the multi-  
162 epitope vaccine.

##### 163 *3.1.1. HLA-I and HLA-II interacting alleles*

164 The selected CTC epitopes (Table 1) showed promiscuous affinity by several HLA-I  
165 alleles, including A\*01:01, A\*02:01, A\*03:01, A\*11:01, A\*23:01, A\*25:01, A\*30:01,  
166 A\*68:01, A\*74:01, B\*07:02, B\*08:01, B\*13:01, B\*13:02, B\*14:02, B\*15:01, B\*15:02,  
167 B\*18:01, B\*27:02, B\*35:03, B\*40:01, B\*58:01, C\*01:02, C\*02:02, C\*02:09, C\*03:02,



168 C\*03:03, C\*03:04, C\*04:01, C\*05:01, C\*06:02, C\*07:01, C\*08:01, C\*12:02, C\*12:03,  
169 C\*14:02, C\*15:02, C\*16:01, and C\*17:01. Likewise, the selected THC epitopes (Table 1)  
170 showed common interaction with the following HLA-II alleles: DRB1\*01:01,  
171 DRB1\*01:03, DRB1\*07:01, DRB1\*15:01, DRB1\*01:20, DRB3\*02:02, DRB4\*01:01, and  
172 DRB5\*01:01.

### 173 *3.2. Prediction of linear BC epitopes*

174 A total of 10 linear BC epitopes of varying amino acid lengths were predicted (Table 2).  
175 Most of the epitopes showed robust viral antigenicity ( $\geq 0.5$ ), as well as, they were  
176 identified as non-allergenic and non-toxic (Table 2). However, only 7 epitopes were  
177 selected for the vaccine design due to they were predicted simultaneously by 3 different  
178 web tools (BCPRED, iBCE-EL, and BepiPred-2.0) (Table 2). Interestingly, overlapping  
179 residues were observed between some linear BC and T cell epitopes.

### 180 *3.3. HLA allele-viral peptide interaction: Molecular docking*

181 To evaluate the presentation of the best epitopes in the context of HLA, molecular  
182 docking simulations were conducted. For this purpose, HLA-C\*06:02 and HLA-  
183 DRB1\*01:01 were chosen as representative alleles.

184 HLA-I and HLA-II alleles were docked with CTC and THC epitopes, respectively, using  
185 the Patchdock server, which has been recently applied to successfully dock epitopes from  
186 SARS-CoV-2 into immune cell receptors [10]. The HLA allele-viral peptide complexes  
187 showed high geometric shape complementarity scores ( $>6000$ ) [52] similar to controls  
188 (Table 3). The inspection on VDM software allowed observing different binding patterns  
189 wherein viral peptides rightly interact with the active site residues of the HLA groove in a  
190 similar way to control peptides (Fig. 2). Moreover, several viral peptides (e.g., E15 and  
191 E33) formed a bulge that projected from their respective HLA allele (Fig. 2B and 2C),  
192 which may suggest a more direct interaction with the T cell receptor [18].

### 193 *3.4. Design of the multi-epitope vaccine against SARS-CoV-2*

#### 194 *3.4.1. General evaluations*

195 To design the amino acid sequence of the multi-epitope vaccine, a total of 26 epitopes (8  
196 CTC, 11 THC, and 7 LBC epitopes) were organized using several linkers (Fig. 1). This  
197 sequence is constituted by 437 amino acid residues (Fig. 1).

198 Of particular note, 6 epitopes selected for the vaccine design (E2, E19, E43, E44, and  
199 E45 in Table 1; E10 in Table 2) harbour residues that are usually involved in the interaction  
200 between the SARS-CoV-2 S glycoprotein and hACE2 [49-51]. For instance, N501—which  
201 is present in the amino acid sequence of E19 (Table 1) and E10 (Table 2)—has been  
202 recently described as one of the critical hACE2-binding residues in SARS-CoV-2 [51].

203 The vaccine showed a strong viral antigenicity (0.64), as well as neither allergenic nor  
204 toxic residues were observed in its amino acid sequence. Furthermore, the physicochemical  
205 properties examined with the ProtParam tool, including molecular weight, theoretical pI,  
206 amino acid composition, atomic composition, extinction coefficient, estimated half-life,  
207 instability index, aliphatic index, and GRAVY, were computed as conventional results  
208 (Table 4).

#### 209 *3.4.2. Structure prediction, refinement, and validation*

210 The 437 amino acid long vaccine construct was analysed using the PSIPRED server to  
211 predict its secondary structure, which identified 316, 70, and 51 amino acids forming coil,  
212 helix, and strand regions, respectively (Fig. 3A).

213 The tertiary structure was subjected to refinement using the GalaxyRefine server. The  
214 output showed five potential models. Model 1 (Fig. 3B) was classified as the best based on  
215 various parameters such as GDT-HA (0.9886), RMSD (0.292), MolProbity (2.364), clash  
216 score (24.4), and poor rotamers score (0.3). Therefore, this model was selected for further  
217 analysis. In this regard, the Ramachandran plot (Fig. 3C) showed that 86.4% of residues  
218 were located in most favoured regions, whereas the remaining residues were observed in  
219 additional allowed (11.7%), generously allowed (1.2%), and disallowed (0.6%) regions. In  
220 addition, the Z-score value (-2.35) (Fig. 3D) suggests that the vaccine structure is similar to  
221 native proteins of comparable size.

#### 222 *3.4.3. Prediction of conformational BC epitopes*

223 Three conformational BC epitopes (CE) were predicted using Ellipro (Fig. 4). These CE  
224 showed high probability scores—CE1: 0.914, CE2: 0.841 and CE3: 0.821, suggesting a  
225 considerable accessibility for antibodies (Fig. 4). Likewise, these results also confirm the  
226 immunogenic potential of the multi-epitope vaccine construct.

#### 227 3.4.4. *TLR4-vaccine model interaction: Molecular docking*

228 The output parameters of the TLR4–vaccine complex showed a suitable geometric shape  
229 complexity (29.237) and the interface area of the interaction (3271.40). Moreover, Fig. 5  
230 clearly showed that the multi-epitope vaccine construct properly occupied the TLR4.

#### 231 3.4.5. *Immune response simulations*

232 The immune response simulations with the multi-epitope vaccine construct (3 doses  
233 given 4 weeks apart) showed cell-mediated and humoral responses. As expected, increased  
234 number and activity of Natural Killer (NK) cells—one of the first lines of defence against  
235 viruses [18], and macrophages were observed (Fig. 6). Regarding the adaptive immune  
236 response, CTC and THC populations showed a proliferative burst, effector cell generation,  
237 and a dramatic cell number contraction (Fig. 6). Importantly, IL-2, which is necessary for T  
238 cell activation and optimal proliferation [18], was amplified after each dose (Fig. 6).  
239 Moreover, the vaccine model increased BC and plasma cell populations, particularly  
240 immunoglobulin M (IgM) and IgG1 isotypes (Fig. 6). In this regard, titres of IgM, IgG1,  
241 and IgG2 were higher in the secondary and tertiary response compared to primary response  
242 (Fig. 6). Of note, immunogen concentrations decreased after antibody response (Fig. 6).  
243 Notably, repeated exposure with 12 injections (given 4 weeks apart) increased the IgG1  
244 levels and stimulated CTC and THC populations (Fig. S1). Taken together, these results  
245 suggest that the multi-epitope vaccine could evoke and maximize both effector responses  
246 and immunological memory to SARS-CoV-2.

#### 247 3.4.6. *Population coverage*

248 To investigate whether the multi-epitope vaccine may be used in different ethnic groups  
249 or globally, a population coverage analysis was performed. Remarkably, the multi-epitope  
250 vaccine construct showed high global population coverage: 99.69%. For instance, several  
251 countries with positive reports of COVID-19 (>6000 cases) [53], obtained the highest

252 values, including, Australia, Brazil, Ecuador, Chile, China, France, Germany, India, Iran,  
253 Israel, Italy, Japan, Mexico, Morocco, Peru, Philippines, Russia, Singapore, South Korea,  
254 Spain, Sweden, USA, UK, etc., (Fig. 7).

255

#### 256 **4. Discussion**

257 Immunoinformatics represents a valuable tool whereby the limitations in the selection of  
258 appropriate antigens and immunodominant epitopes may be overcome [17]. Previous *in*  
259 *silico*-based reports have shown that the SARS-CoV-2 S glycoprotein contains potential  
260 epitopes [8-11]. Therefore, researchers have recently attempted to design epitope-based  
261 vaccine candidates against SARS-CoV-2 [10, 11]. Despite these relevant contributions, one  
262 group only used T cell epitopes and did not include BC epitopes [10], which are  
263 fundamental players in antiviral immune response [18]. The second work, on the other  
264 hand, considered several viral membrane proteins, including the S glycoprotein, to  
265 identify probable T and BC epitopes [11]. Although the predicted epitopes showed good  
266 immunogenic potential, the vaccine does not target S glycoprotein RBM [11]. In the  
267 present study, highly potential B and T cell epitopes from the SARS-CoV-2 glycoprotein  
268 were predicted and the best selected to design a high-quality multi-epitope vaccine  
269 candidate. Remarkably, this vaccine harbours 2 epitopes (E19 in Table 1 and E10 in Table  
270 2) that could evoke immune responses against SARS-CoV-2 RBM—the main responsible  
271 for virus entry into human cells [4,51], whereas 4 epitopes (E43, E44, E45, and E46 in  
272 Table 1) may direct the immune attack against other regions of SARS-CoV-2 RBD. These  
273 results are consistent with *in vitro* data that have demonstrated the antigenicity of the  
274 SARS-CoV-2 S glycoprotein [4].

275 The T cell epitopes included in the vaccine sequence accomplish with relevant requisites  
276 to design a suitable multi-epitope vaccine candidate. Firstly, they showed a marked  
277 antigenicity, immunogenicity, and lack of allergenic or toxic residues. Secondly, the THC  
278 epitopes were predicted as potent inducers of IFN- $\gamma$ —a crucial cytokine for CTC  
279 activation [18]. Thirdly, both CTC and THC epitopes properly interacted with the groove of  
280 HLA-I and HLA-II alleles, respectively, which is in agreement with other computer-based

281 reports [54], thereby suggesting that the T cell epitopes identified and selected in the  
282 present study could be successfully presented in the context of HLA molecules.

283 The purpose of an adjuvant is to make a vaccine “detectable” for antigen-presenting  
284 cells such as dendritic cells [55]. In this regard, adjuvants approved or in clinical trials  
285 (NCT01609257) for virus-like particle-based vaccines are constituted by TLR4 agonists  
286 [55]. Here, the TLR4 adjuvant known as RS09 [33] was included in the multi-epitope  
287 vaccine sequence. The molecular docking simulation showed that the multi-epitope vaccine  
288 rightly interacts with this innate immune receptor in a similar way to previous works [35].

289 Notably, this study shows, by immunoinformatics simulations, the induction of both  
290 innate and adaptive responses to SARS-CoV-2. In this regard, NK cell and macrophage  
291 activation were detected, as well as high production of typical antibodies (IgM and IgG),  
292 cytokines (IFN- $\gamma$  and IL-2), and a proliferative burst of CTC and THC were observed after  
293 three injections. The generation and increase of plasma cells were also documented.  
294 Furthermore, B and T cell populations decreased along with immunogen levels. These data  
295 is comparable to previous investigations that have been focused on vaccine development  
296 against *Mycobacterium ulcerans* [46] and filarial diseases [56], as well as are in agreement,  
297 at least partially, with a recent study that demonstrated a positive correlation between  
298 robust CD4+ THC responses with anti-SARS-CoV-2 IgG and IgA titres of COVID-19  
299 convalescent patients [57]. These immune responses were directed to the SARS-CoV-2 S  
300 glycoprotein [57].

301 This work was limited by A) the population coverage analysis did not include some  
302 countries, particularly from Africa, Central America, Eastern Europe, and Central Asia.  
303 This was mainly due to data not available concerning the HLA allele frequencies.  
304 Nevertheless, the highest population coverage was observed in several of the worst-hit  
305 countries by COVID-19 (e.g, Brazil, China, France, Italy, Iran, Peru, Spain, USA, etc.)  
306 [52]. B) This study did not explore whether the epitopes used for vaccine design are  
307 conserved in other beta-coronaviruses. However, former reports have already demonstrated  
308 that SARS-CoV-2 shares 79.5% and 50% sequence identity to SARS-CoV and MERS-  
309 CoV, respectively [58].

310 In summary, this study provides a novel multi-epitope vaccine built from high potential  
311 epitopes derived from the SARS-CoV-2 S glycoprotein. This immunoinformatics study  
312 suggests that such multi-epitope vaccine could activate and generate robust humoral and  
313 cell-mediated responses in a simultaneous manner against SARS-CoV-2, as well as the  
314 population coverage analysis indicates that it could be used globally. However, further  
315 rigorous *in vitro* and *in vivo* studies are imperative to confirm its immunogenic properties,  
316 safety, and efficacy, which—of course—would imply months, even years.

317

### 318 **Acknowledgments**

319 I wish to thank the support of the Venezuelan Institute for Scientific Research (IVIC) –  
320 Venezuela, and Laboratory of Cellular and Molecular Pathology-IVIC.

321

### 322 **Declarations of interest**

323 None.

324

### 325 **Founding**

326 This research did not receive any specific grant from funding agencies in the public,  
327 commercial, or not-for-profit sectors.

328

## References

- [1] World Health Organization. Coronavirus disease (COVID-19) Pandemic. <https://www.who.int/emergencies/diseases/novel-coronavirus-2019> (Accessed 19 May 2020).
- [2] P. Zhou, X.L. Yang, X.G. Wang, B. Hu, L. Zhang, W. Zhang, et al., A pneumonia outbreak associated with a new coronavirus of probable bat origin, *Nature*. 579 (2020) 270–273, <https://doi.org/10.1038/s41586-020-2012-7>.
- [3] Y. Jin, H. Yang, W. Ji, W. Wu, S. Chen, W. Zhang, G. Duan, *Virology, Epidemiology, Pathogenesis, and Control of COVID-19, Viruses*. 12 (2020) E372, <https://doi.org/10.3390/v12040372>.
- [4] A.C. Walls, Y.J. Park, M.A. Tortorici, A. Wall, A.T. McGuire, D. Velesler, Structure, Function, and Antigenicity of the SARS-CoV-2 Spike Glycoprotein, *Cell*. 181 (2020) 281–292, <https://doi.org/10.1016/j.cell.2020.02.058>.
- [5] F. Amanat, F. Krammer, SARS-CoV-2 Vaccines: Status Report, *Immunity*. 52 (2020) 583–589, <https://doi.org/10.1016/j.immuni.2020.03.007>.
- [6] W.Y. Zhou, Y. Shi, C. Wu, W.J. Zhang, X.H. Mao, G. Guo, H.X. Li, Q.M. Zou, Therapeutic efficacy of a multi-epitope vaccine against *Helicobacter pylori* infection in BALB/c mice model, *Vaccine*. 27 (2009) 5013–5019, <https://doi.org/10.1016/j.vaccine.2009.05.009>.
- [7] M.R. Dikhit, A. Kumar, S. Das, B. Dehury, A.K. Rout, F. Jamal, G.C. Sahoo, R.K. Topno, K. Pandey, V. Das, S. Bimal, P. Das, Identification of Potential MHC Class-II-Restricted Epitopes Derived from *Leishmania donovani* Antigens by Reverse Vaccinology and Evaluation of Their CD4+ T-Cell Responsiveness against Visceral Leishmaniasis, *Front. Immunol.* 8 (2017) 1763, <https://doi.org/10.3389/fimmu.2017.01763>.
- [8] A. Grifoni, J. Sidney, Y. Zhang, R.H. Scheuermann, B. Peters, A. Sette, A Sequence Homology and Bioinformatic Approach Can Predict Candidate Targets for Immune Responses to SARS-CoV-2, *Cell. Host. Microbe*. 27(2020) 671–680.e2, <https://doi.org/10.1016/j.chom.2020.03.002>.
- [9] G. Lucchese, Epitopes for a 2019-nCoV vaccine, *Cell. Mol. Immunol.* 17 (2020) 539–540, <https://doi.org/10.1038/s41423-020-0377-z>.
- [10] M. Bhattacharya, A.R. Sharma, P. Patra, P. Ghosh, G. Sharma, B.C. Patra, S.S. Lee, C. Chakraborty, Development of epitope-based peptide vaccine against novel coronavirus 2019 (SARS-COV-2): Immunoinformatics approach, *J. Med. Virol.* (2020) 10.1002/jmv.25736. Advance online publication, <https://doi.org/10.1002/jmv.25736>.
- [11] P. Kalita, A. Padhi, K. Zhang, T. Tripathi, Design of a peptide-based subunit vaccine against novel coronavirus SARS-CoV-2, *Microb. Pathog.* (2020) 104236 Advance online publication, <https://doi.org/10.1016/j.micpath.2020.104236>.
- [12] World Health Organization. Biologicals: Nonclinical evaluation of vaccines. [https://www.who.int/biologicals/vaccines/nonclinical\\_evaluation\\_of\\_vaccines/en/](https://www.who.int/biologicals/vaccines/nonclinical_evaluation_of_vaccines/en/) (Accessed 19 May 2020).
- [13] I. Dimitrov, L. Naneva, I. Doytchinova, I. Bangov, AllergenFP: allergenicity prediction by descriptor fingerprints, *Bioinformatics*. 30 (2014) 846–851, <https://doi.org/10.1093/bioinformatics/btt619>.
- [14] S. Saha, G.P. Raghava, AlgPred: prediction of allergenic proteins and mapping of IgE epitopes, *Nucleic Acids. Res.* 34 (2006) W202–W209, <https://doi.org/10.1093/nar/gkl343>.
- [15] S. Gupta, P. Kapoor, K. Chaudhary, A. Gautam, R. Kumar, Open Source Drug Discovery Consortium, G. P. Raghava, In silico approach for predicting toxicity of peptides and proteins, *PloS one*. 8 (2013) e73957, <https://doi.org/10.1371/journal.pone.0073957>.
- [16] I.A. Doytchinova, D.R. Flower, VaxiJen: a server for prediction of protective antigens, tumour antigens and subunit vaccines, *BMC bioinformatics*. 8 (2007) 4, <https://doi.org/10.1186/1471-2105-8-4>.
- [17] M. Sharma, F. Krammer, A. García-Sastre, S. Tripathi, Moving from Empirical to Rational Vaccine Design in the 'Omics' Era, *Vaccines*. 7 (2019) 89, <https://doi.org/10.3390/vaccines7030089>.
- [18] J. Owen, J. Punt, S. Stranford, J. Pat, *Kuby Immunology*, Seventh ed., W.H. Freeman and Company, New York, 2013.
- [19] Y. Kim, J. Ponomarenko, Z. Zhu, D. Tamang, P. Wang, J. Greenbaum, C. Lundegaard, A. Sette, O. Lund, P.E. Bourne, M. Nielsen, B. Peters, Immune epitope database analysis resource, *Nucleic Acids. Res.* 40 (2012) W525–W530, <https://doi.org/10.1093/nar/gks438>.
- [20] S. Tenzer, B. Peters, S. Bulik, O. Schoor, C. Lemmel, M.M. Schatz, P.M. Kloetzel, H.G. Rammensee, H. Schild, H.G. Holzhütter, Modeling the MHC class I pathway by combining predictions of proteasomal

- cleavage, TAP transport and MHC class I binding, *Cell. Mol. Life Sci.* 62 (2005) 1025–1037, <https://doi.org/10.1007/s00018-005-4528-2>.
- [21] M. Moutaftsi, B. Peters, V. Pasquetto, D.C. Tschärke, J. Sidney, H.H. Bui, H. Grey, A. Sette, A consensus epitope prediction approach identifies the breadth of murine T(CD8<sup>+</sup>)-cell responses to vaccinia virus, *Nat. Biotechnol.* 24 (2006) 817–819, <https://doi.org/10.1038/nbt1215>.
- [22] I. Hoof, B. Peters, J. Sidney, L.E. Pedersen, A. Sette, O. Lund, S. Buus, M. Nielsen, NetMHCpan, a method for MHC class I binding prediction beyond humans. *Immunogenetics*, 61(2009) 1–13, <https://doi.org/10.1007/s00251-008-0341-z>.
- [23] P. Wang, J. Sidney, C. Dow, B. Mothé, A. Sette, B. Peters, A systematic assessment of MHC class II peptide binding predictions and evaluation of a consensus approach, *PLoS Comput. Biol.* 4 (2008) e1000048, <https://doi.org/10.1371/journal.pcbi.1000048>.
- [24] M. Nielsen, C. Lundegaard, T. Blicher, B. Peters, A. Sette, S. Justesen, S. Buus, O. Lund., Quantitative predictions of peptide binding to any HLA-DR molecule of known sequence: NetMHCIIpan, *PLoS Comput. Biol.* 4 (2008) e1000107, <https://doi.org/10.1371/journal.pcbi.1000107>.
- [25] M. Nielsen, C. Lundegaard, O. Lund, Prediction of MHC class II binding affinity using SMM-align, a novel stabilization matrix alignment method, *BMC bioinformatics.* 8 (2007) 238, <https://doi.org/10.1186/1471-2105-8-238>.
- [26] S.K. Dhandu, P. Vir, G.P. Raghava, Designing of interferon-gamma inducing MHC class-II binders, *Biol. Direct.* 8 (2013) 30, <https://doi.org/10.1186/1745-6150-8-30>.
- [27] S. Saha, G.P. Raghava, Prediction of continuous B-cell epitopes in an antigen using recurrent neural network, *Proteins.* 65 (2006) 40–48, <https://doi.org/10.1002/prot.21078>.
- [28] B. Manavalan, R.G. Govindaraj, T.H. Shin, M.O. Kim, G. Lee, iBCE-EL: A New Ensemble Learning Framework for Improved Linear B-Cell Epitope Prediction, *Front. Immunol.* 9 (2018) 1695, <https://doi.org/10.3389/fimmu.2018.01695>.
- [29] M.C. Jespersen, B. Peters, M. Nielsen, P. Marcatili, BepiPred-2.0: improving sequence-based B-cell epitope prediction using conformational epitopes, *Nucleic Acids. Res.* 45 (2017) W24–W29, <https://doi.org/10.1093/nar/gkx346>.
- [30] J. Maupetit, P. Derreumaux, P. Tuffery, A fast and accurate method for large-scale de novo peptide structure prediction, *J. Comput. Chem.* 31 (2010) 726–38, <https://doi.org/10.1002/jcc.21365>.
- [31] D. Schneidman-Duhovny, Y. Inbar, R. Nussinov, H.J. Wolfson, PatchDock and SymmDock: servers for rigid and symmetric docking, *Nucleic Acids. Res.* 33(2005) W363–W367, <https://doi.org/10.1093/nar/gki481>.
- [32] W. Humphrey, A. Dalke, K. Schulten, VMD – Visual Molecular Dynamics, *J. Molec. Graph.* 14 (1996) 33–38, [https://doi.org/10.1016/0263-7855\(96\)00018-5](https://doi.org/10.1016/0263-7855(96)00018-5).
- [33] A. Shanmugam, S. Rajoria, A.L. George, A. Mittelman, R. Suriano, R.K. Tiwari, Synthetic Toll like receptor-4 (TLR-4) agonist peptides as a novel class of adjuvants, *PloS one.* 7 (2012) e30839, <https://doi.org/10.1371/journal.pone.0030839>.
- [34] S.N. Lester, K. Li, Toll-like receptors in antiviral innate immunity, *J. Mol. Biol.* 426 (2014) 1246–1264, <https://doi.org/10.1016/j.jmb.2013.11.024>.
- [35] R.K. Pandey, T.K. Bhatt, V.K. Prajapati, Novel Immunoinformatics Approaches to Design Multi-epitope Subunit Vaccine for Malaria by Investigating Anopheles Salivary Protein, *Sci. Rep.* 8 (2018) 1125, <https://doi.org/10.1038/s41598-018-19456-1>.
- [36] M.R. Wilkins, E. Gasteiger, A. Bairoch, J.C. Sanchez, K.L. Williams, R.D. Appel, D.F. Hochstrasser, Protein identification and analysis tools in the ExPASy server, *Methods Mol Biol.* 112 (1999) 531–552, <https://doi.org/10.1385/1-59259-584-7:531>.
- [37] C.N. Magnan, A. Randall, P. Baldi, SOLpro: accurate sequence-based prediction of protein solubility, *Bioinformatics.* 25 (2009) 2200–2207, <https://doi.org/10.1093/bioinformatics/btp386>.
- [38] D.T. Jones, Protein secondary structure prediction based on position-specific scoring matrices, *J. Mol. Biol.* 292 (1999) 195–202, <https://doi.org/10.1006/jmbi.1999.3091>.
- [39] D. Buchan, D.T. Jones, The PSIPRED Protein Analysis Workbench: 20 years on, *Nucleic Acids. Res.* 47 (2019) W402–W407, <https://doi.org/10.1093/nar/gkz297>.
- [40] W.H. Shin, G. R. Lee, L. Heo, H. Lee, C. Seok, Prediction of Protein Structure and Interaction by GALAXY protein modeling programs, *Bio. Design.* 2 (2014) 1–11.
- [41] J. Ko, H. Park, L. Heo, C. Seok, GalaxyWEB server for protein structure prediction and refinement, *Nucleic Acids. Res.* 40 (2012) W294–W297, <https://doi.org/10.1093/nar/gks493>.



- [42] R.A. Laskowski, M.W. MacArthur, D.S. Moss, J.M. Thornton, PROCHECK - a program to check the stereochemical quality of protein structures, *J. App. Cryst.* 26 (1993) 283-291.
- [43] M. Wiederstein, M.J. Sippl, ProSA-web: interactive web service for the recognition of errors in three-dimensional structures of proteins, *Nucleic acids research.* 35(2007), W407–W410, <https://doi.org/10.1093/nar/gkm290>.
- [44] J. Ponomarenko, H.H. Bui, W. Li, N. Fusseder, P.E. Bourne, A. Sette, B.Peters, ElliPro: a new structure-based tool for the prediction of antibody epitopes, *BMC bioinformatics.* 9 (2008) 514, <https://doi.org/10.1186/1471-2105-9-514>.
- [45] N. Rapin, O. Lund, M. Bernaschi, F. Castiglione, Computational immunology meets bioinformatics: the use of prediction tools for molecular binding in the simulation of the immune system, *PloS one.* 5(2010) e9862, <https://doi.org/10.1371/journal.pone.0009862>.
- [46] Z. Nain, M.M. Karim, M.K. Sen, U.K. Adhikari, Structural basis and designing of peptide vaccine using PE-PGRS family protein of Mycobacterium ulcerans-An integrated vaccinomics approach, *Mol. Immunol.* 120 (2020) 146–163, <https://doi.org/10.1016/j.molimm.2020.02.009>.
- [47] H.H. Bui, J. Sidney, K. Dinh, S. Southwood, M.J. Newman, A. Sette, Predicting population coverage of T-cell epitope-based diagnostics and vaccines, *BMC bioinformatics.* 7 (2006) 153, <https://doi.org/10.1186/1471-2105-7-153>.
- [48] RStudio Team (2015). RStudio: Integrated Development for R. RStudio, Inc., Boston, MA URL <http://www.rstudio.com/>.
- [49] J.T. Ortega, M.L. Serrano, F.H. Pujol, H.R. Rangel, Role of changes in SARS-CoV-2 spike protein in the interaction with the human ACE2 receptor: An in silico analysis, *EXCLI J.* 19 (2020) 410–417, <https://doi.org/10.17179/excli2020-1167>.
- [50] J. Lan, J. Ge, J. Yu, S. Shan, H. Zhou, S. Fan, Q. Zhang, X. Shi, Q. Wang, L. Zhang, X. Wang, Structure of the SARS-CoV-2 spike receptor-binding domain bound to the ACE2 receptor, *Nature.* 581(7807) (2020) 215–220, <https://doi.org/10.1038/s41586-020-2180-5>.
- [51] J. Shang, G. Ye, K. Shi, Y. Wan, C. Luo, H. Aihara, Q. Geng, A. Auerbach, F. Li, Structural basis of receptor recognition by SARS-CoV-2, *Nature.* (2020) 10.1038/s41586-020-2179-y. <https://doi.org/10.1038/s41586-020-2179-y>.
- [52] D. Duhovny, R. Nussinov, H.J. Wolfson, Efficient Unbound Docking of Rigid Molecules, in Gusfield et al. (Eds.), *Proceedings of the 2'nd Workshop on Algorithms in Bioinformatics(WABI) Rome, Italy, Lecture Notes in Computer Science, Springer Verlag, 2452, pp. 185-200.*
- [53] World Health Organization. Coronavirus disease (COVID-2019) situation reports. <https://www.who.int/emergencies/diseases/novel-coronavirus-2019/situation-reports/> (Accessed 19 May 2020).
- [54] V. Baruah, S. Bose, Immunoinformatics-aided identification of T cell and B cell epitopes in the surface glycoprotein of 2019-nCoV, *J. Med. Virol.* 92 (2020) 495–500, <https://doi.org/10.1002/jmv.25698>.
- [55] V. Cimica, J.M. Galarza, Adjuvant formulations for virus-like particle (VLP) based vaccines, *Clin. Immunol.* 183 (2017) 99–108, <https://doi.org/10.1016/j.clim.2017.08.004>.
- [56] R.A. Shey, S.M. Ghogomu, K.K. Esoh, N.D. Nebangwa, C.M. Shintouo, N.F. Nongley, B.F. Asa, F.N. Ngale, L. Vanhamme, J. Souopgui, In-silico design of a multi-epitope vaccine candidate against onchocerciasis and related filarial diseases, *Sci. Rep.* 9 (2019) 4409, <https://doi.org/10.1038/s41598-019-40833-x>.
- [57] A. Grifoni, D. Weiskopf, S.I. Ramirez, J. Mateus, J.M. Dan, C.R. Moderbacher, S.A. Rawlings, A. Sutherland, L. Premkumar, R.S. Jadi, D. Marrama, A.M. de Silva, A. Frazier, A. Carlin, J.A. Greenbaum, B. Peters, F. Krammer, D.M. Smith, S. Crotty, A. Sette, Targets of T cell responses to SARS-CoV-2 coronavirus in humans with COVID-19 disease and unexposed individuals, *Cell.* (2020), doi: <https://doi.org/10.1016/j.cell.2020.05.015>.
- [58] R. Lu, X. Zhao, J. Li, P. Niu, B. Yang, H. Wu, W. Wang, H. Song, B. Huang, N. Zhu, Y. Bi, X. Ma, F. Zhan, L. Wang, T. Hu, H. Zhou, Z. Hu, W. Zhou, L. Zhao, J. Chen, Y. Meng, J. Wang, Y. Lin, J. Yuan, Z. Xie, J. Ma, W.J. Liu, D. Wang, W. Xu, E.C. Holmes, G.F. Gao, G. Wu, W. Chen, W. Shi, W. Tan., Genomic characterisation and epidemiology of 2019 novel coronavirus: implications for virus origins and receptor binding, *Lancet.* 395 (10224) (2020) 565–574, [https://doi.org/10.1016/S0140-6736\(20\)30251-8](https://doi.org/10.1016/S0140-6736(20)30251-8).

**Table 1**

Evaluation of potential T cell epitopes.

| ID                       | Epitope sequence | Position<br>(star-end) | Percentile<br>Rank | Viral<br>antigenicity | Allergenicity   | Toxicity | IFN-g<br>inductor | Selected<br>for vaccine<br>design |
|--------------------------|------------------|------------------------|--------------------|-----------------------|-----------------|----------|-------------------|-----------------------------------|
| CTC-E (9-mer peptides):  |                  |                        |                    |                       |                 |          |                   |                                   |
| E1                       | EPLVDLPIG        | 224-232                | 4.1                | 0.46                  | Negative        | Negative | ne                | No                                |
| <b>E2</b>                | <b>APGQTGKIA</b> | <b>411-419</b>         | <b>1.8</b>         | <b>1.20</b>           | <b>Negative</b> | Negative | <b>ne</b>         | <b>Yes</b>                        |
| <b>E3</b>                | <b>VVLSFELLH</b> | <b>511-519</b>         | <b>1.5</b>         | <b>1.41</b>           | <b>Negative</b> | Negative | <b>ne</b>         | <b>Yes</b>                        |
| E4                       | FPLQSYGFQ        | 490-498                | 0.4                | 0.46                  | Positive        | Negative | ne                | No                                |
| E5                       | ATRFASVYA        | 344-352                | 0.2                | 0.09                  | Negative        | Negative | ne                | No                                |
| <b>E6</b>                | <b>VDLPIGINI</b> | <b>227-235</b>         | <b>0.01</b>        | <b>1.38</b>           | <b>Negative</b> | Negative | <b>ne</b>         | <b>Yes</b>                        |
| <b>E7</b>                | <b>FTISVTTEI</b> | <b>718-726</b>         | <b>0.01</b>        | <b>0.85</b>           | <b>Negative</b> | Negative | <b>ne</b>         | <b>Yes</b>                        |
| E8                       | SVYAWNRKR        | 349-357                | 0.01               | 0.76                  | Positive        | Negative | ne                | No                                |
| E9                       | YLQPRTFLL        | 269-277                | 0.02               | 0.45                  | Positive        | Negative | ne                | No                                |
| <b>E10</b>               | <b>VRFPNITNL</b> | <b>327-335</b>         | <b>0.03</b>        | <b>1.11</b>           | <b>Negative</b> | Negative | <b>ne</b>         | <b>Yes</b>                        |
| E11                      | FERDISTEI        | 464-472                | 0.04               | 0.74                  | Positive        | Negative | ne                | No                                |
| E12                      | TLDSKTQSL        | 109-117                | 0.04               | 1.06                  | Positive        | Negative | ne                | No                                |
| E13                      | KIADYNYKL        | 417-425                | 0.04               | 1.66                  | Positive        | Negative | ne                | No                                |
| E14                      | YLQPRTFLL        | 269-277                | 0.04               | 0.45                  | Positive        | Negative | ne                | No                                |
| <b>E15</b>               | <b>YSKHTPINL</b> | <b>204-212</b>         | <b>0.05</b>        | <b>1.05</b>           | <b>Negative</b> | Negative | <b>ne</b>         | <b>Yes</b>                        |
| E16                      | VGYLQPRTF        | 267-275                | 0.06               | 1.22                  | Positive        | Negative | ne                | No                                |
| E17                      | TLKSFTVEK        | 302-310                | 0.06               | 0.08                  | Positive        | Negative | ne                | No                                |
| <b>E18</b>               | <b>FEYVSQPFL</b> | <b>168-176</b>         | <b>0.07</b>        | <b>0.63</b>           | <b>Negative</b> | Negative | <b>ne</b>         | <b>Yes</b>                        |
| <b>E19</b>               | <b>GFQPTNGVG</b> | <b>496-504</b>         | <b>5.9</b>         | <b>0.64</b>           | <b>Negative</b> | Negative | <b>ne</b>         | <b>Yes</b>                        |
| E20                      | VRQIAPGQT        | 407-415                | 18.0               | 0.86                  | Positive        | Negative | ne                | No                                |
| THC-E (15-mer peptides): |                  |                        |                    |                       |                 |          |                   |                                   |
| E21                      | ITRFQTLALHRSYL   | 235-270                | 0.02               | 0.11                  | Negative        | Negative | Yes               | No                                |
| E22                      | QSLIVNATNVVIK    | 115-129                | 0.02               | 0.43                  | Negative        | Negative | No                | No                                |

|            |                         |                |              |             |                 |          |            |            |
|------------|-------------------------|----------------|--------------|-------------|-----------------|----------|------------|------------|
| E23        | LSFELLHAPATVCGP         | 513-527        | 0.03         | 0.51        | Negative        | Negative | No         | No         |
| <b>E24</b> | <b>VVLSFELLHAPATVC</b>  | <b>511-525</b> | <b>0.03</b>  | <b>0.86</b> | <b>Negative</b> | Negative | <b>Yes</b> | <b>Yes</b> |
| E25        | SLLVNNAATNVVIKV         | 116-130        | 0.03         | 0.47        | Negative        | Negative | Yes        | No         |
| <b>E26</b> | <b>KTQSLLVNNAATNVV</b>  | <b>113-127</b> | <b>0.17</b>  | <b>0.63</b> | <b>Negative</b> | Negative | <b>Yes</b> | <b>Yes</b> |
| <b>E27</b> | <b>AIPTNFTISVTTEIL</b>  | <b>713-727</b> | <b>0.40</b>  | <b>0.68</b> | <b>Negative</b> | Negative | <b>Yes</b> | <b>Yes</b> |
| <b>E28</b> | <b>SFVIRGDEVQRQIAPG</b> | <b>399-413</b> | <b>0.51</b>  | <b>0.58</b> | <b>Negative</b> | Negative | <b>Yes</b> | <b>Yes</b> |
| E29        | TPINLVRDLPQGSA          | 208-222        | 0.51         | 0.55        | Negative        | Negative | No         | No         |
| <b>E30</b> | <b>TRFASVYAWNRKRIS</b>  | <b>345-358</b> | <b>0.52</b>  | <b>0.50</b> | <b>Negative</b> | Negative | <b>Yes</b> | <b>Yes</b> |
| E31        | IPNFTISVTTEILP          | 714-728        | 0.52         | 0.83        | Negative        | Negative | No         | No         |
| E32        | PTESIVRFPNITNLC         | 322-336        | 0.64         | 0.25        | Negative        | Negative | No         | No         |
| <b>E33</b> | <b>ECSNLLLQYGSFCTQ</b>  | <b>748-762</b> | <b>0.72</b>  | <b>0.76</b> | <b>Negative</b> | Negative | <b>Yes</b> | <b>Yes</b> |
| E34        | LQIPFAMQMAYRFNG         | 894-908        | 0.73         | 0.72        | Negative        | Negative | No         | No         |
| E35        | HTPINLVRDLPQGFS         | 207-221        | 0.74         | 0.39        | Negative        | Negative | No         | No         |
| E36        | ADYSVLYNSASFSTF         | 363-377        | 0.85         | 0.22        | Negative        | Negative | No         | No         |
| E37        | SKTQSLLVNNAATNV         | 112-126        | 0.99         | 0.62        | Positive        | Negative | No         | No         |
| E38        | TDEMIAQYTSALLAG         | 866-880        | 1.10         | 0.16        | Negative        | Negative | Yes        | No         |
| E39        | QMAYRFNGIGVTQNV         | 901-915        | 1.10         | 1.03        | Negative        | Negative | No         | No         |
| E40        | QIPFAMQMAYRFNGI         | 895-909        | 0.44         | 0.96        | Negative        | Negative | No         | No         |
| E41        | AALQIPFAMQMAYRF         | 892-906        | 0.44         | 0.91        | Negative        | Negative | No         | No         |
| <b>E42</b> | <b>LEPLVDLPIGINITR</b>  | <b>223-237</b> | <b>28.00</b> | <b>1.01</b> | <b>Negative</b> | Negative | <b>Yes</b> | <b>Yes</b> |
| <b>E43</b> | <b>DEVQRQIAPGQTGKIA</b> | <b>405-419</b> | <b>27.00</b> | <b>0.98</b> | <b>Negative</b> | Negative | <b>Yes</b> | <b>Yes</b> |
| <b>E44</b> | <b>EVRQIAPGQTGKIAD</b>  | <b>406-420</b> | <b>33.00</b> | <b>1.34</b> | <b>Negative</b> | Negative | <b>Yes</b> | <b>Yes</b> |
| <b>E45</b> | <b>VRQIAPGQTGKIADY</b>  | <b>407-421</b> | <b>41.00</b> | <b>1.30</b> | <b>Negative</b> | Negative | <b>Yes</b> | <b>Yes</b> |
| <b>E46</b> | <b>RQIAPGQTGKIADYN</b>  | <b>408-422</b> | <b>49.00</b> | <b>1.52</b> | <b>Negative</b> | Negative | <b>Yes</b> | <b>Yes</b> |
| E47        | EGFNCYFPLQSYGFQ         | 484-498        | 7.20         | 0.57        | Negative        | Positive | Yes        | No         |

E: Epitope; CTC-E: cytotoxic T cell epitope; THC-E: T helper cell epitope; ne: not evaluated; Epitopes highlighted in boldface were selected for final vaccine design.

**Table 2**

Evaluation of potential linear B cell epitopes.

| ID         | Epitope sequence          | Position<br>(star-end) | Predicted on BCPRED,<br>iBCE-EL, and BepiPred-<br>2.0 | Viral<br>antigenicity | Allergenicity   | Toxicity         | Selected<br>for vaccine<br>design |
|------------|---------------------------|------------------------|-------------------------------------------------------|-----------------------|-----------------|------------------|-----------------------------------|
| <b>E1</b>  | <b>TTLDSKTQSL</b>         | <b>127-136</b>         | <b>Yes</b>                                            | <b>0.99</b>           | <b>Negative</b> | <b>Non-Toxin</b> | <b>Yes</b>                        |
| <b>E2</b>  | <b>MDLEGKQGNFKNREF</b>    | <b>196-211</b>         | <b>Yes</b>                                            | <b>0.83</b>           | <b>Negative</b> | <b>Non-Toxin</b> | <b>Yes</b>                        |
| <b>E3</b>  | <b>PDPSKPSKRS</b>         | <b>826-835</b>         | <b>Yes</b>                                            | <b>0.84</b>           | <b>Negative</b> | <b>Non-Toxin</b> | <b>Yes</b>                        |
| <b>E4</b>  | <b>ILDITPCSFGGVSVITPG</b> | <b>603-620</b>         | <b>Yes</b>                                            | <b>1.10</b>           | <b>Negative</b> | <b>Non-Toxin</b> | <b>Yes</b>                        |
| E5         | YQPVRVVVLSFELLH           | 524-538                | Negative on iBCE-EL                                   | 0.97                  | Negative        | Non-Toxin        | No                                |
| <b>E6</b>  | <b>FSTFKCYGVSPT</b>       | <b>270-281</b>         | <b>Yes</b>                                            | <b>0.81</b>           | <b>Negative</b> | <b>Non-Toxin</b> | <b>Yes</b>                        |
| E7         | VYYHKNNKSWMESEFRVYSS      | 162-181                | Yes                                                   | 0.30                  | Negative        | Non-Toxin        | No                                |
| E8         | GDEVQRQIAPGQTGKI          | 423-437                | Negative on iBCE-EL                                   | 0.97                  | Negative        | Non-Toxin        | No                                |
| <b>E9</b>  | <b>NLDSKVGGNVNY</b>       | <b>459-470</b>         | <b>Yes</b>                                            | <b>1.09</b>           | <b>Negative</b> | <b>Non-Toxin</b> | <b>Yes</b>                        |
| <b>E10</b> | <b>GFQPTNGVGYQPVR</b>     | <b>496-509</b>         | <b>Yes</b>                                            | <b>0.72</b>           | <b>Negative</b> | <b>Non-Toxin</b> | <b>Yes</b>                        |

E: epitope; Epitopes highlighted in boldface were selected for final vaccine design.

**Table 3.**

Patchdock score based on geometric shape complementarity scores (GSCS) of the HLA allele-epitope complexes.

| Complex:<br>HLA allele – Epitope <sup>a</sup> |                        | GSCS                   |
|-----------------------------------------------|------------------------|------------------------|
| HLA-C*06:02                                   | <b>Control peptide</b> | <b>8.132</b>           |
|                                               | E2:APGQTGKIA           | 6.818                  |
|                                               | E3:VVLSFELLH           | 6.640                  |
|                                               | E6:VDLPIGINI           | 7.498                  |
|                                               | E7:FTISVTTEI           | 7.526                  |
|                                               | E10:VRFPNITNL          | 7.338                  |
|                                               | E15:YSKHTPINL          | 7.766                  |
|                                               | E18:FEYVSQPFL          | 6.918                  |
|                                               | E19:GFQPTNGVG          | 7.198                  |
|                                               | HLA-DRB1*01:01         | <b>Control peptide</b> |
| E24:VVLSFELLHAPATVC                           |                        | 7.750                  |
| E26:KTQSLIVNNATNVV                            |                        | 8.890                  |
| E27:AIPTNFTISVTTEIL                           |                        | 8.802                  |
| E28:SFVIRGDEVQRQIAPG                          |                        | 8.458                  |
| E30:TRFASVYAWNRKRIS                           |                        | 8.936                  |
| E33:ECSNLLLQYGSFCTQ                           |                        | 8.330                  |
| E42:LEPLVDLPIGINITR                           |                        | 8.904                  |
| E43:DEVQRQIAPGQTGKIA                          |                        | 8.066                  |
| E44:EVRQIAPGQTGKIAD                           |                        | 8.760                  |
| E45:VRQIAPGQTGKIADY                           |                        | 9.076                  |
| E46:RQIAPGQTGKIADYN                           |                        | 8.360                  |

<sup>a</sup>Epitopes are named following the nomenclature established in Table 1.

**Table 4**

Physicochemical parameters of the multiple-epitope vaccine construct.

| <b>Parameter</b>                            | <b>Value</b>                           | <b>Comment</b>   |
|---------------------------------------------|----------------------------------------|------------------|
| Number of aa                                | 437                                    | Suitable         |
| Molecular Weight                            | 46kDa                                  | Average          |
| Theoretical pI                              | 9.61                                   | Slightly basic   |
| Negatively charged residues (N + Q)         | 25                                     |                  |
| Positively charged residues (R + K)         | 44                                     | Charged positive |
| Extinction coefficient (at 280 nm in water) | 32570 M <sup>-1</sup> cm <sup>-1</sup> | -                |
| The instability index (II)                  | 26.02                                  | Stable           |
| Aliphatic index                             | 74.58                                  | Thermostable     |
| GRAVY                                       | -0.298                                 | Hydrophilic      |
| Solubility                                  | 0.703269                               | Soluble          |
| Estimated half-life:                        |                                        | Satisfactory     |
| Mammalian reticulocytes (in vitro)          | 4.4 hours                              |                  |
| Yeast (in vivo)                             | >20 hours                              |                  |
| <i>Escherichia coli</i> (in vivo)           | >10 hours                              |                  |

aa: amino acid; GRAVY: Grand average of hydropathicity

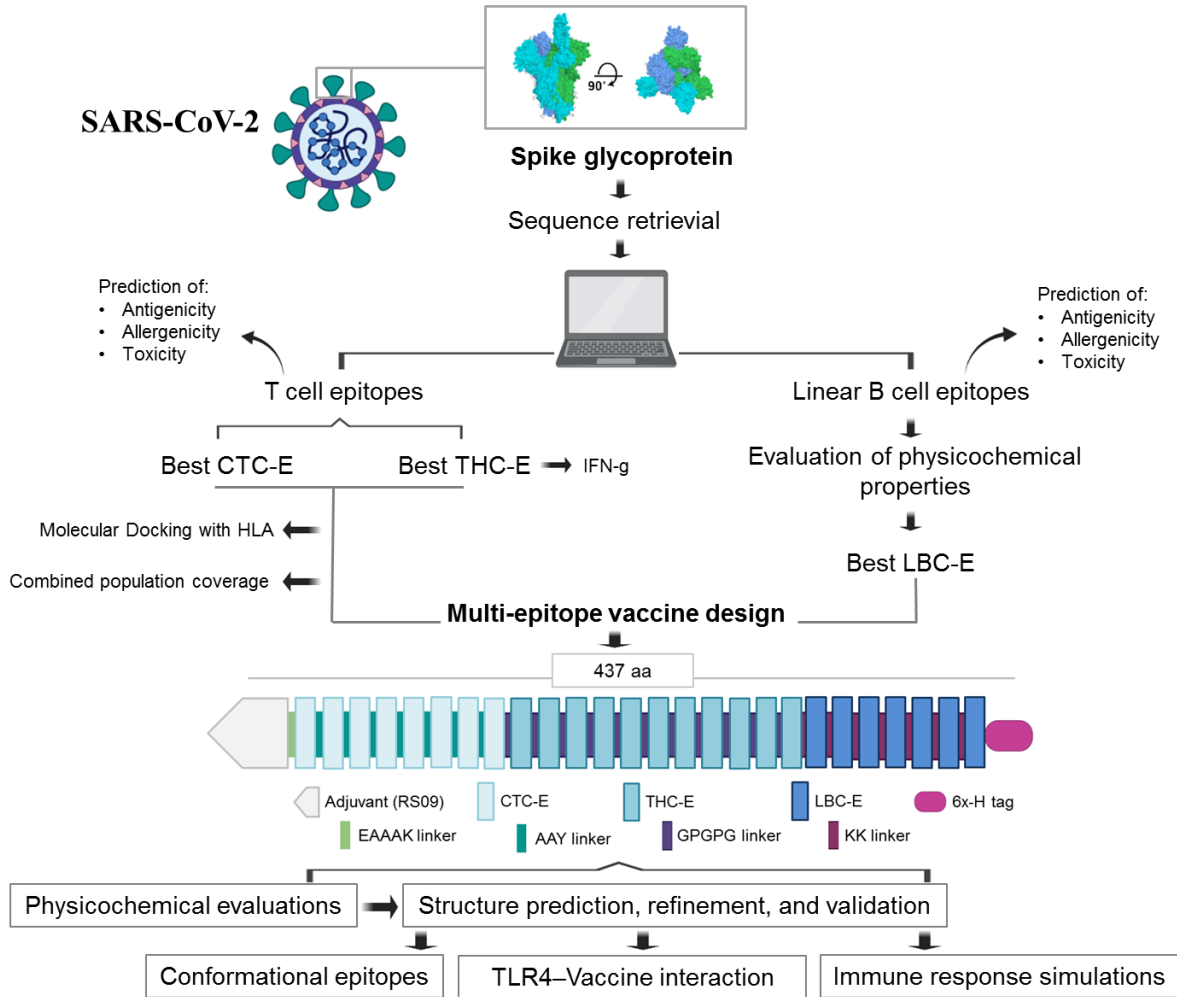

**Fig. 1.** Overall experimental workflow (made with Biorender.com). Best epitopes predicted from the SARS-CoV-2 S glycoprotein were selected to design the multi-epitope vaccine construct, which was subjected to further in silico evaluations. CTC-E: cytotoxic T cell epitope. THC-E: T helper cell epitope. LBC-E: linear B cell epitopes. IFN-g: Interferon gamma. aa: amino acid. 6x-H: polyhistidine tag.

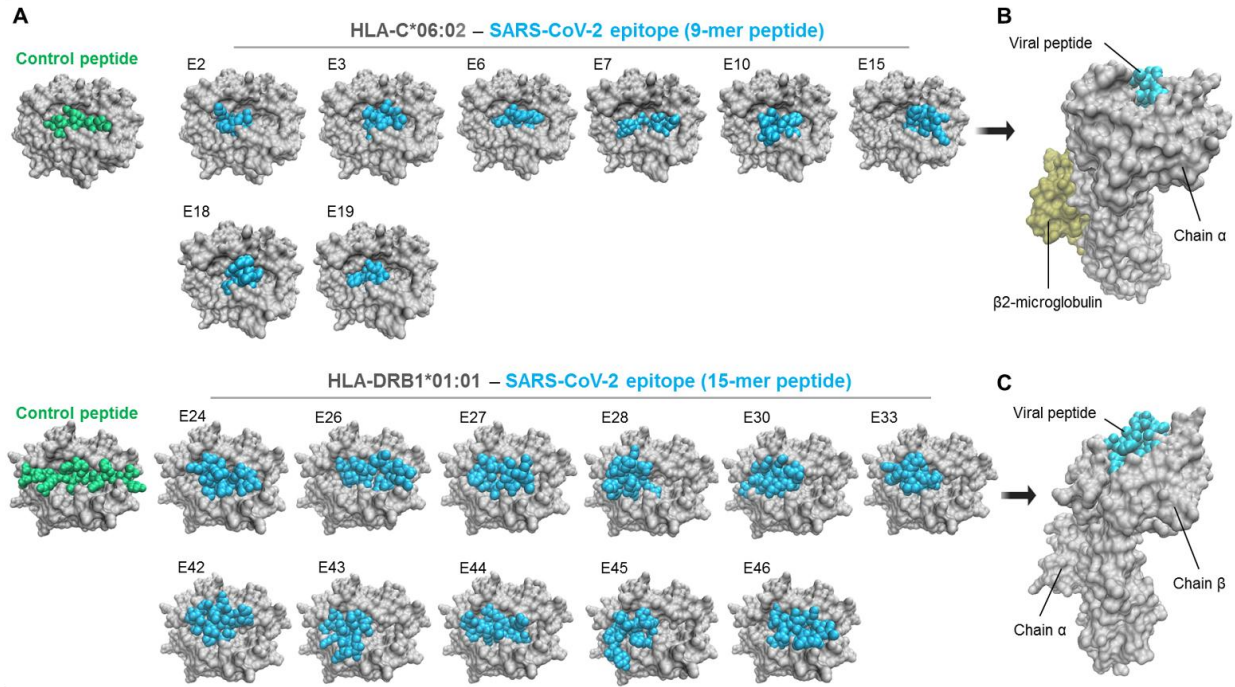

**Fig. 2.** Screenshots of the HLA-viral peptide complexes. (A) Top view of HLA-C\*06:02 and HLA-DRB1\*01:01 presenting 9-mer and 15-mer viral peptides, respectively. (B-C) Representative lateral views of HLA alleles interacting with viral peptides. Of note, peptides formed a bulge that project from the HLA groove. Epitopes are named according to the nomenclature established in Table 1. HLA alleles, viral peptides, and control peptides are shown in grey, cyan, and green, respectively.



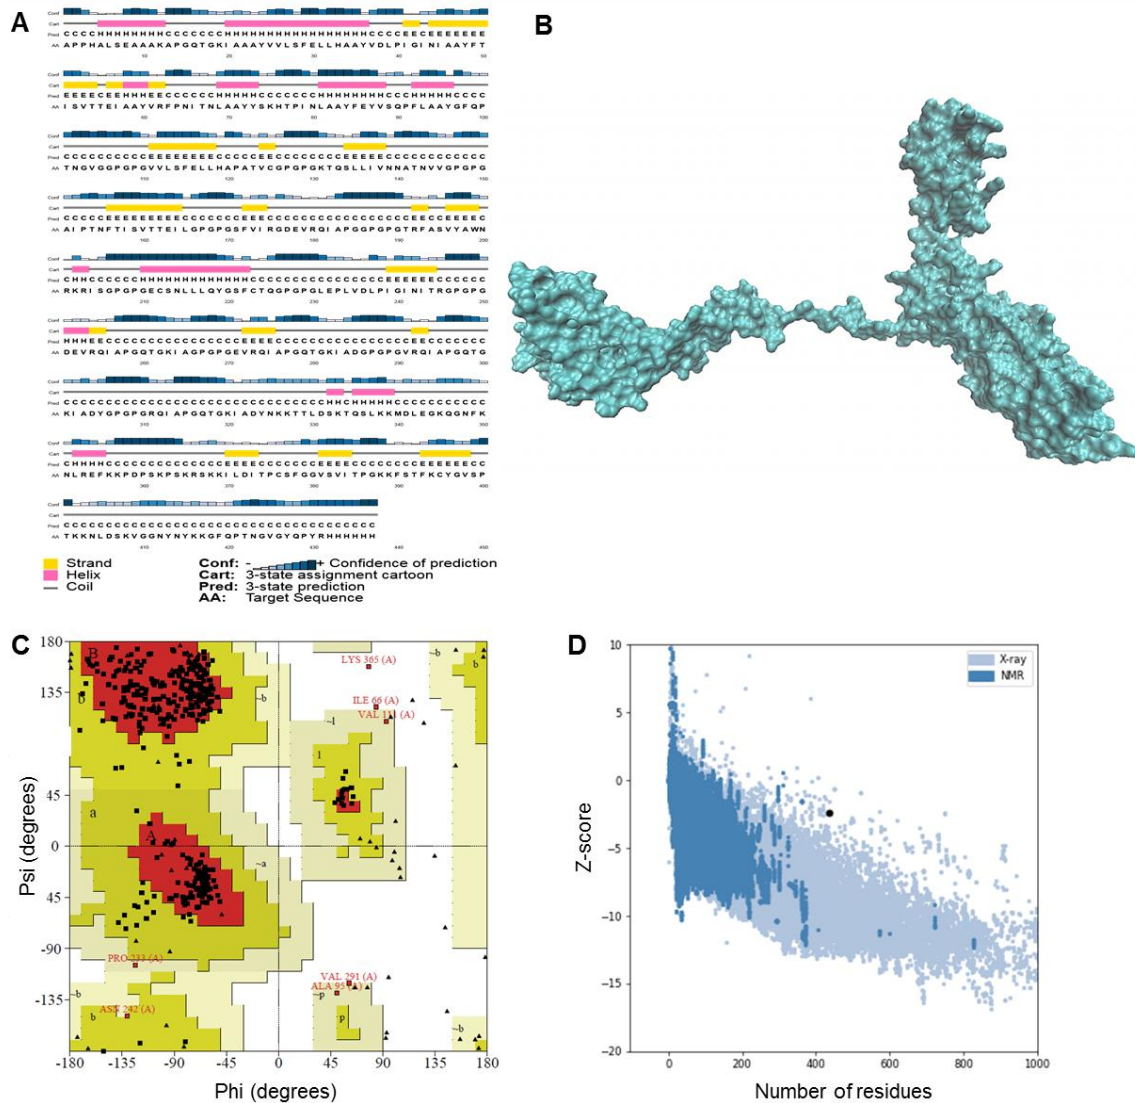

**Fig. 3.** Structure predictions and validation of the multi-epitope vaccine. (A) Graphical illustration of the secondary structure prediction showing the presence of coil, helix and strand regions. (B) Tertiary structure after refinement showed in space-filling model. (C) Ramachandran plot of the 3D refined structure. (D) Z-score plot obtained from ProSA-web.

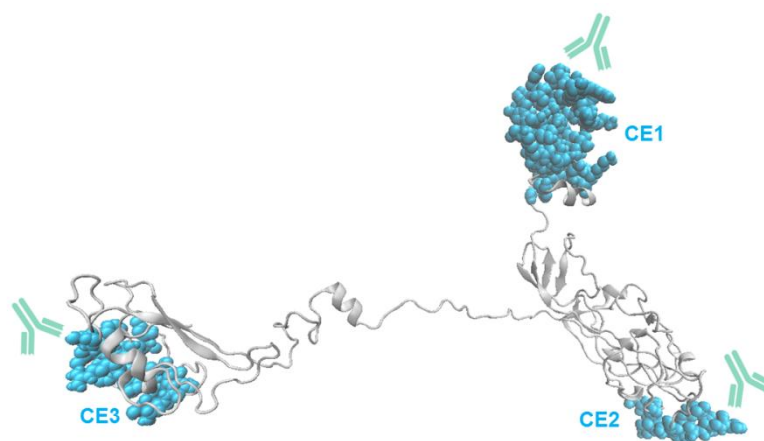

**Fig. 4.** Best conformational B cell epitopes (CE) identified in the multi-epitope vaccine. These epitopes (cyan atoms) showed high probability scores ( $>0.8$ ) suggesting a considerable accessibility for antibodies (showed in turquoise).

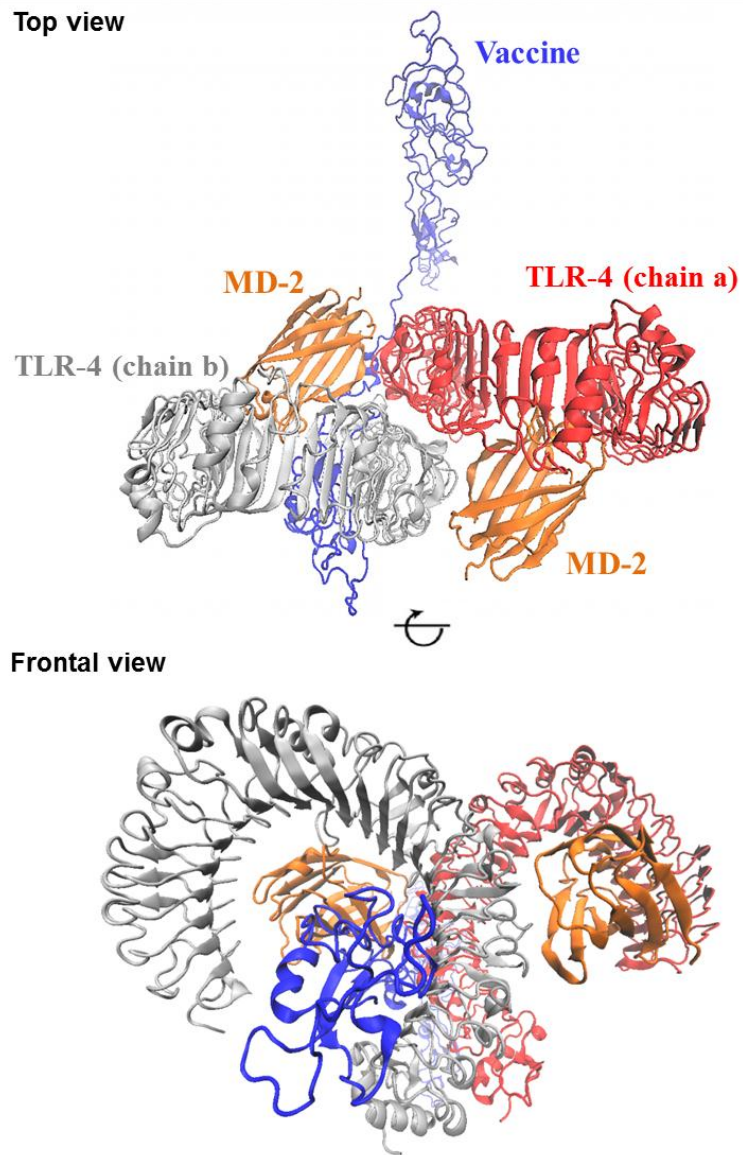

**Fig. 5.** Docked complex of TLR4, MD-2 (myeloid differentiation factor 2), and the multi-epitope vaccine.

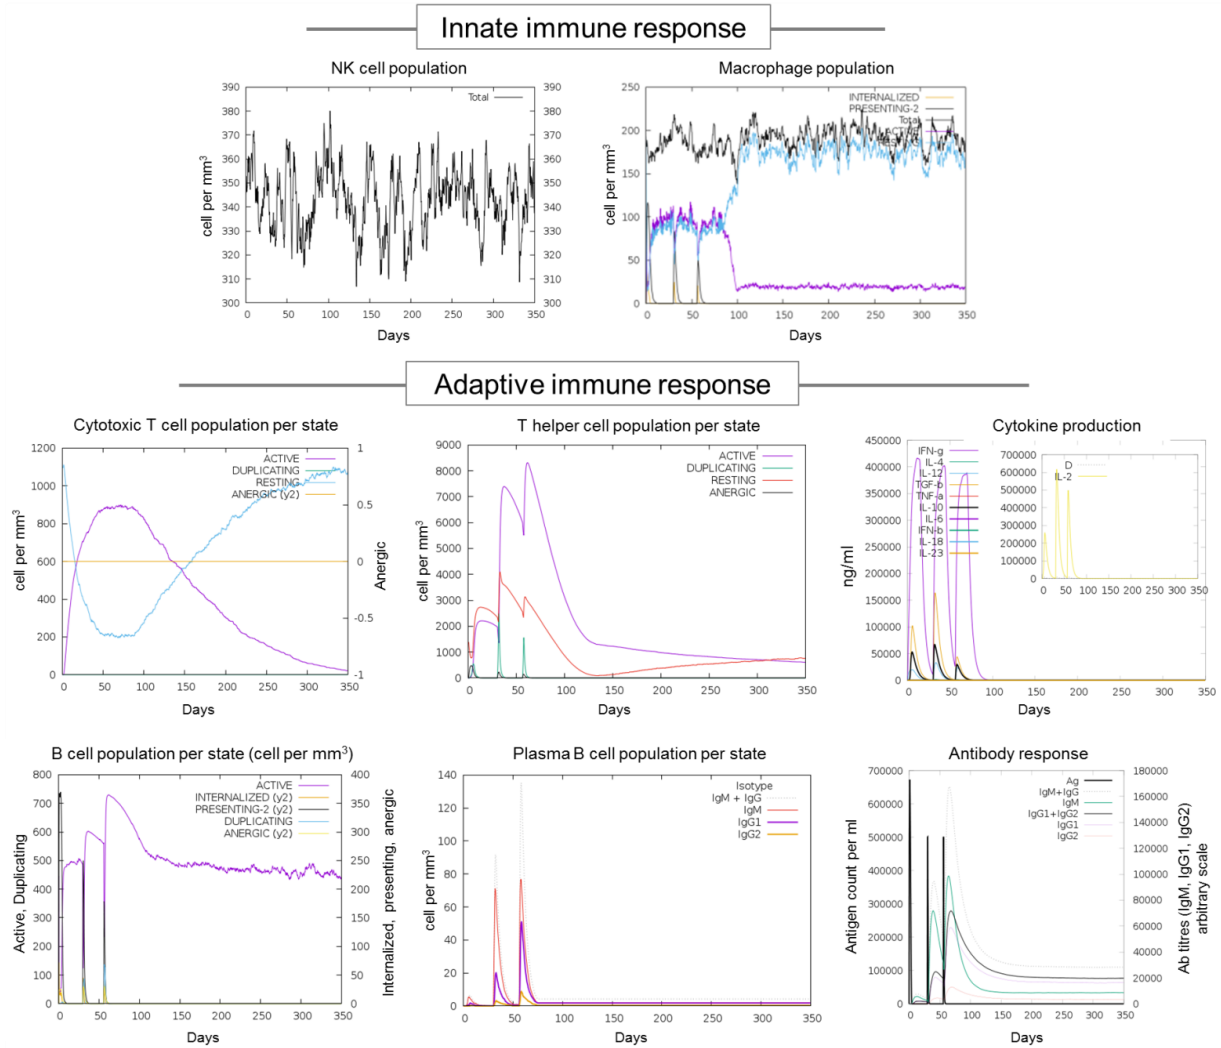

**Fig. 6.** Immune response simulations with the multi-epitope vaccine (3 doses given 4 weeks apart).

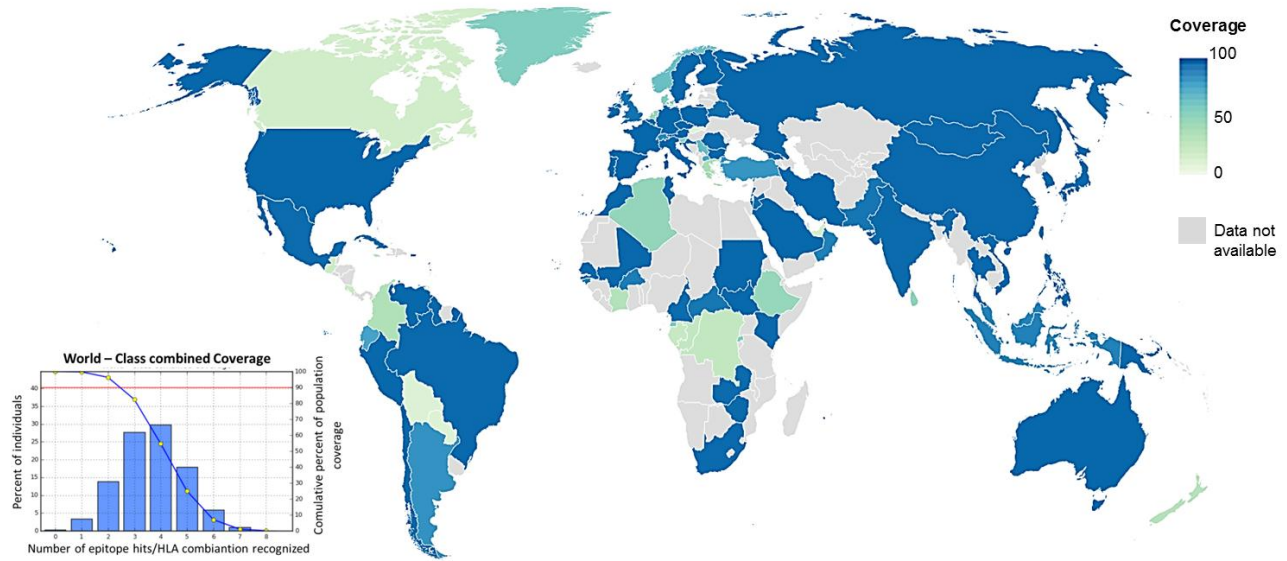

**Fig. 7.** Combined HLA population coverage analysis of the multi-epitope vaccine against SARS-CoV-2.

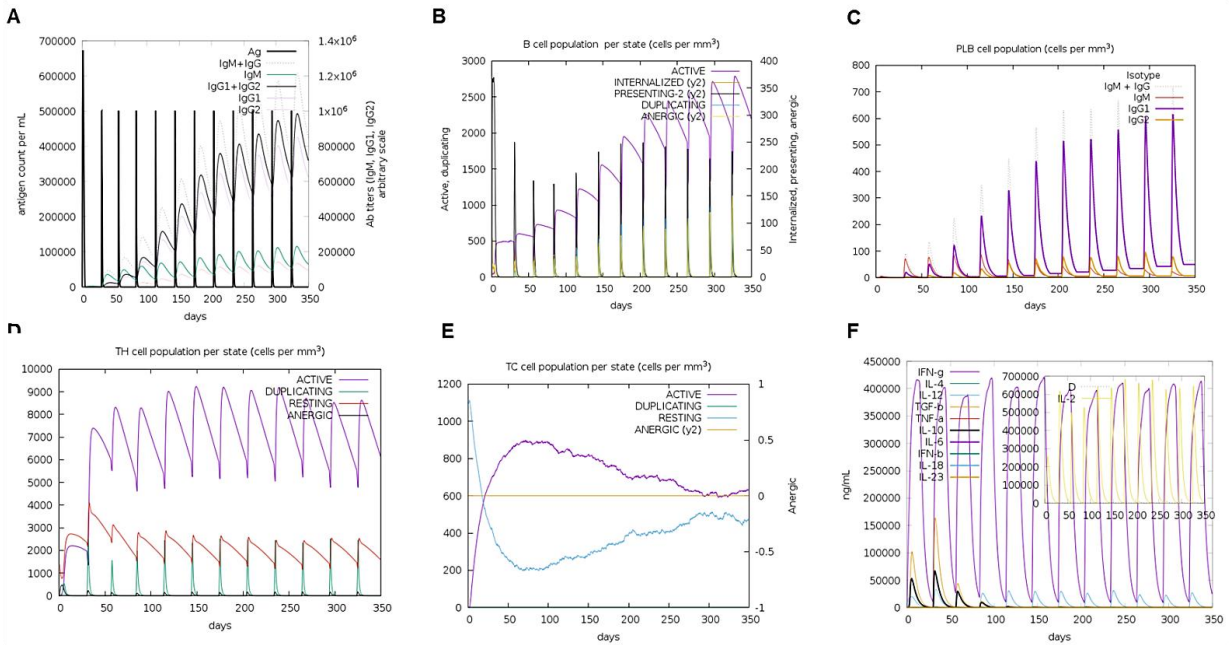

**Fig. S1.** Immune response simulations with the multi-epitope vaccine (12 doses given 4 weeks apart). (A) B-cell activation and production of immunoglobulin. (B-C) Amount of B-cell and plasma cell populations. (D-E) T-helper cell and CTC cell populations per state after stimulation. (F) Cytokine levels induced after vaccine doses, including IL-2 (inset).
